# Supplementary material for: High-performance enzymatic membrane bioreactor based on a radial gradient of pores in a PSF membrane via facile enzyme immobilization
Source: Royal Society of Chemistry journal article supplement (doi:10.1039/c5ra25602j), 2016-01-01
Supplement: c5ra25602j1.pdf [file c5ra25602j1.pdf]

**Supporting Information:**

**Table 1**

Central composite rotatable design for the hydrolysis condition of EMR

| Exp.no. | Design 1     |                                                        | Design 2 |           |
|---------|--------------|--------------------------------------------------------|----------|-----------|
|         | C<br>(mol/L) | membrane flux<br>(L·m <sup>-2</sup> ·h <sup>-1</sup> ) | pH       | T<br>(°C) |
| 1       | 0.20         | 102.6                                                  | 8.5      | 25        |
| 2       | 0.05         | 197.7                                                  | 5.5      | 40        |
| 3       | 0.20         | 197.7                                                  | 7.0      | 40        |
| 4       | 0.10         | 287.4                                                  | 7.0      | 55        |
| 5       | 0.20         | 287.4                                                  | 8.5      | 55        |
| 6       | 0.10         | 197.7                                                  | 7.0      | 40        |
| 7       | 0.05         | 197.7                                                  | 5.5      | 50        |
| 8       | 0.10         | 197.7                                                  | 7.0      | 40        |
| 9       | 0.10         | 197.7                                                  | 7.0      | 40        |
| 10      | 0.05         | 102.6                                                  | 5.5      | 25        |
| 11      | 0.10         | 102.6                                                  | 7.0      | 25        |
| 12      | 0.10         | 197.7                                                  | 7.0      | 40        |
| 13      | 0.10         | 197.7                                                  | 7.0      | 40        |

C, substrate concentration

**Table 2**

ANOVA table for designs 1 and 2.

|            | SS                     |                        | Df |    | MS                     |                        | F-values |       | P-values | Probe>F |
|------------|------------------------|------------------------|----|----|------------------------|------------------------|----------|-------|----------|---------|
|            | 1                      | 2                      | 1  | 2  | 1                      | 2                      | 1        | 2     | 1        | 2       |
| Model      | 3.006×10 <sup>-3</sup> | 0.025                  | 5  | 5  | 6.012×10 <sup>-4</sup> | 5.006×10 <sup>-3</sup> | 36.53    | 49.85 | 0.0002   | <0.0001 |
| A          | 2.307×10 <sup>-3</sup> | 1.583×10 <sup>-3</sup> | 1  | 1  | 2.307×10 <sup>-3</sup> | 1.583×10 <sup>-3</sup> | 140.18   | 15.77 | <0.0001  | 0.0054  |
| B          | 2.407×10 <sup>-6</sup> | 1.082×10 <sup>-3</sup> | 1  | 1  | 2.407×10 <sup>-6</sup> | 1.082×10 <sup>-3</sup> | 0.15     | 10.77 | 0.7001   | 0.0134  |
| Residual   | 9.874×10 <sup>-5</sup> | 7.029×10 <sup>-4</sup> | 7  | 7  | 5.760×10 <sup>-6</sup> | 1.494×10 <sup>-5</sup> |          |       |          |         |
| Pure Error | 2.330×10 <sup>-6</sup> | 3.653×10 <sup>-5</sup> | 4  | 4  | 7.767×10 <sup>-7</sup> | 6.670×10 <sup>-7</sup> |          |       |          |         |
| Cor Total  | 3.105×10 <sup>-3</sup> | 0.026                  | 12 | 12 |                        |                        |          |       |          |         |

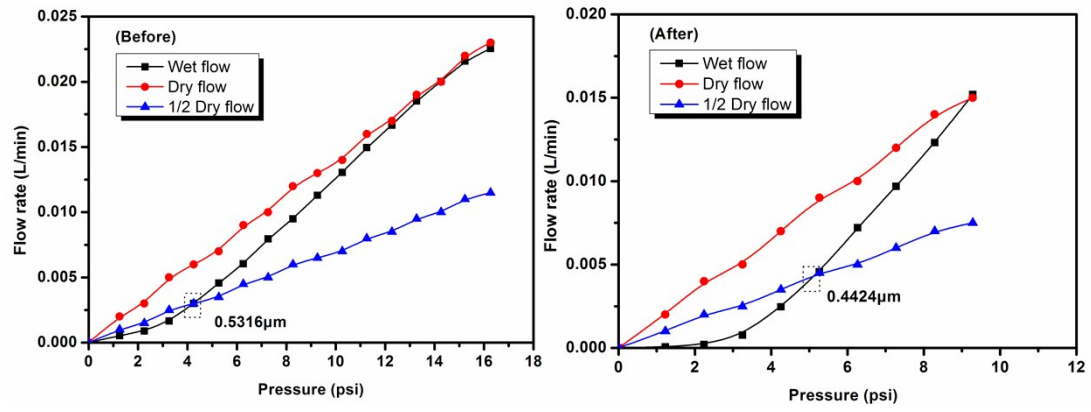

**Figure 1** Sketch of the pressure-flow rate curves for the polysulfone hollow fiber membranes before and after the lipase immobilization measured by LLP
